# Supplementary material for: Microflower-like Co9S8@MoS2 heterostructure as an efficient bifunctional catalyst for overall water splitting
Source: Royal Society of Chemistry journal article supplement (doi:10.1039/d2ra04086g), 2022-01-01
Supplement: d2ra04086g1.pdf [file d2ra04086g1.pdf]

*Supporting Information*

**Microflower-like Co<sub>9</sub>S<sub>8</sub>@MoS<sub>2</sub> heterostructure as an efficient bifunctional catalyst for overall water splitting**

Chaohai Pang,<sup>‡ a,b\*</sup> Xionghui Ma,<sup>‡ a,b</sup> Yuwei Wu,<sup>a,b</sup> Shuhuai Li,<sup>a,b\*</sup> Zhi Xu,<sup>a,b</sup> Mingyue Wang,<sup>a,b</sup> · Xiaojing Zhu,<sup>c\*</sup>

<sup>a</sup> *Analysis and Test Center, Chinese Academy of Tropical Agricultural Sciences, Hainan Provincial Key Laboratory of Quality and Safety for Tropical Fruits and Vegetables, Key Laboratory of Quality and Safety Control for Subtropical Fruit and Vegetable, Ministry of Agriculture and Rural Affairs Haikou, 571101, China*

<sup>b</sup> *Key Laboratory of Tropical Fruits and Vegetables Quality and Safety for State Market Regulation, Haikou, 570311, China*

<sup>c</sup> *Research Center of Advanced Chemical Equipment, Chemistry and Chemical Engineering Guangdong Laboratory, Shantou 515041, China*

*Address correspondence to E-mail: 18389859589@163.com; happylishuhuai@163.com; xiaoj\_zhu@163.com*

*‡ C.P and X.M contributed equally to this work.*

## **Experimental section**

### **Materials**

Cobalt nitrate hexahydrate ( $\text{Co}(\text{NO}_3)_2 \cdot 6\text{H}_2\text{O}$ , 99%) and ethanol were obtained from Aladdin Chemical Co. Sodium molybdate dihydrate ( $\text{Na}_2\text{MoO}_4 \cdot 2\text{H}_2\text{O}$ , 99.5%), formaldehyde (36%–38%), thiourea (99%), and ethylenediamine (99%) were obtained from Sigma-Aldrich Chemical Co. The commercial Pt/C powder (20wt%) was provided by Shanghai Macklin Biochemical Technology Co., Ltd.

### **Preparation of $\text{Co}_9\text{S}_8@\text{MoS}_2$**

In a typical experiment,  $\text{Co}(\text{NO}_3)_2 \cdot 6\text{H}_2\text{O}$ , thiourea, and  $\text{Na}_2\text{MoO}_4 \cdot 2\text{H}_2\text{O}$  were added to 40 mL of deionised water, and the mixture was thoroughly stirred for even dispersion. Subsequently, ethylenediamine and formaldehyde were added dropwise under continuous stirring. The final molar ratio of thiourea/Co/ethylenediamine/formaldehyde/Mo was 1.5:1:1:2:0.001. Subsequently, the mixture was poured into a stainless steel autoclave (50 mL) lined with polytetrafluoroethylene and then reacted at 180 °C for one day. The obtained sample was washed with deionised water and ethanol and then desiccated in an oven. Finally, the  $\text{Co}_9\text{S}_8@\text{MoS}_2$  heterostructure was pyrolyzed at 2 °C  $\text{min}^{-1}$  to 500 °C and held for 2 h in nitrogen atmosphere.

Corresponding  $\text{Co}_9\text{S}_8$  and  $\text{MoS}_2$  materials were fabricated using the same procedure, but lacking  $\text{Na}_2\text{MoO}_4 \cdot 2\text{H}_2\text{O}$  and  $\text{Co}(\text{NO}_3)_2 \cdot 6\text{H}_2\text{O}$ , respectively. And the synthesized processes of  $\text{Co}_9\text{S}_8@\text{MoS}_2$ -low and  $\text{Co}_9\text{S}_8@\text{MoS}_2$ -high were similar to those of  $\text{Co}_9\text{S}_8@\text{MoS}_2$  heterostructure while the final molar ratio was correspondingly changed to 1.5:1:1:2:0.0005 and 1.5:1:1:2:0.0015.

### **Material characterisation**

To characterise the crystal structures of the composites, X-ray diffraction (XRD) was recorded on a Rigaku RINT 2000 instrument (Cu  $\text{K}\alpha$  radiation, 40 kV, 40 mA). The microstructures of  $\text{Co}_9\text{S}_8@\text{MoS}_2$  were investigated using Hitachi SU-8000 electron microscopy. Elemental mapping and transmission electron microscopy (TEM) were

carried out using a JEM-2100F microscope operated at 200 kV. The composition of Co<sub>9</sub>S<sub>8</sub>@MoS<sub>2</sub> was evaluated using X-ray photoelectron spectroscopy (XPS; Phi X-tool). The surface areas and pore size distribution were determined by the Brunauer-Emmett-Teller (BET) and Barrett-Joyner-Halenda (BJH) method, respectively, using N<sub>2</sub> isotherm measured with a Micromeritics ASAP 2460 analyser (USA).

### **Electrochemical measurements**

In a three-electrode system, the HER and OER activities of Co<sub>9</sub>S<sub>8</sub>@MoS<sub>2</sub> were investigated on a CHI 750E electrochemical workstation at ambient temperature. To prepare the electrocatalyst ink, 4 mg of the composite material was suspended in 1.0 mL of 0.05 wt.% Nafion in ethanol by ultrasonication. Then, the catalyst ink was drop-cast onto a glassy carbon electrode (GCE) and dried at 30 °C to obtain a catalyst loading of 404 μg cm<sup>-2</sup>. In alkaline medium, the modified GCE was used as the working electrode, an Ag/AgCl electrode as the reference electrode and a graphite rod as the counter electrode. When the electrocatalytic measurements were conducted under acidic conditions, a saturated calomel electrode was utilised as the counter electrode instead of the graphite rod. The potentials measured in 1 M KOH and 0.5 M H<sub>2</sub>SO<sub>4</sub> were converted to the reversible hydrogen electrode (RHE) scale based on the equations:  $E_{\text{RHE}} = E_{\text{Ag/AgCl}} + 0.1976 + 0.059 \times \text{pH}$  and  $E_{\text{RHE}} = E_{\text{SCE}} + 0.241 + 0.059 \times \text{pH}$ . All potentials were recorded at a scan rate of 10 mV s<sup>-1</sup>.

The electrochemical double-layer capacitance ( $C_{\text{dl}}$ ) of each sample was tested by employing cyclic voltammetry at non-Faradaic potentials between 0.3 and 0.5 V at sweep rates from 20 to 100 mV s<sup>-1</sup>. The discrepancy in current density between the cathodic and anodic sweeps at 0.35 V vs. RHE in 1 M KOH was plotted against the scan rate, and the slope of the linear regression line was obtained. The value of the slope is twice that of  $C_{\text{dl}}$ .

In a two-electrode system, the overall water splitting measurements were organised in 1.0 M KOH. A nickel foam (0.4 cm<sup>2</sup>) loaded with 0.4 mg of electrocatalyst was utilised as the working electrode.

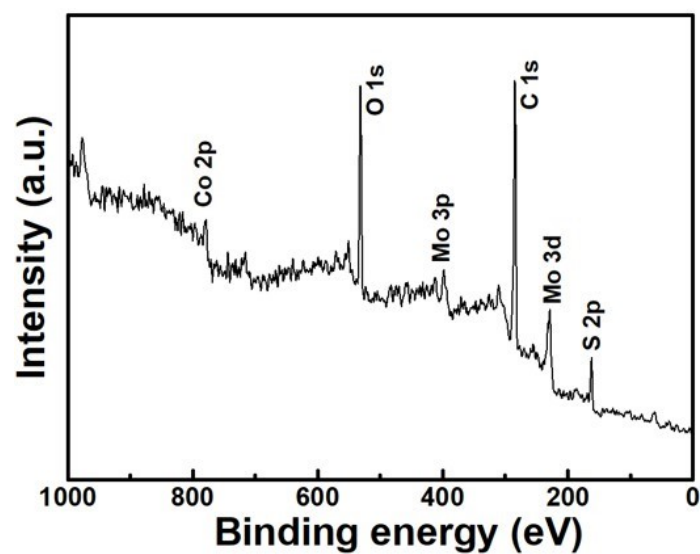

**Figure S1.** XPS spectrum of the obtained  $\text{Co}_9\text{S}_8@\text{MoS}_2$  heterostructure.

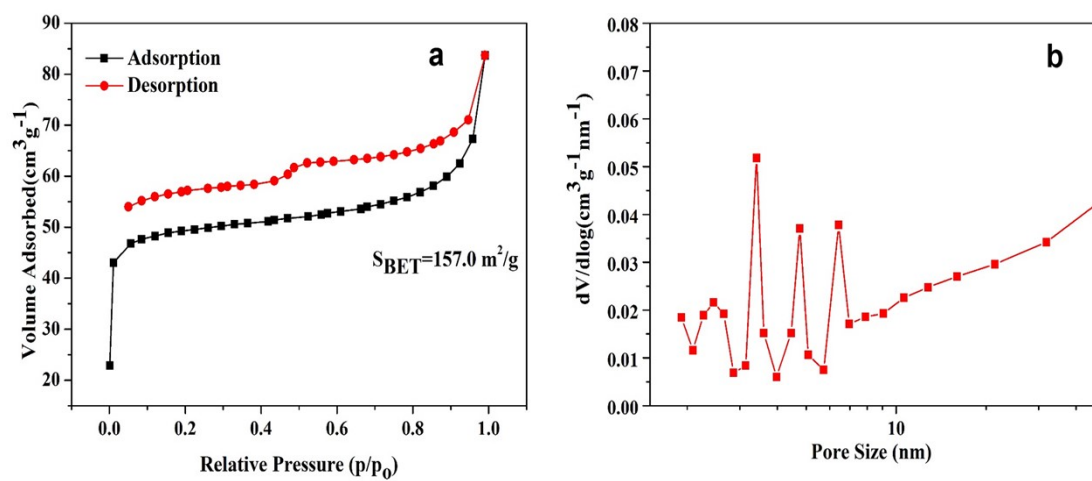

**Figure S2.** (a)  $\text{N}_2$  adsorption-desorption isotherms and (b) the corresponding pore size distribution of the typical sample  $\text{Co}_9\text{S}_8@\text{MoS}_2$ .

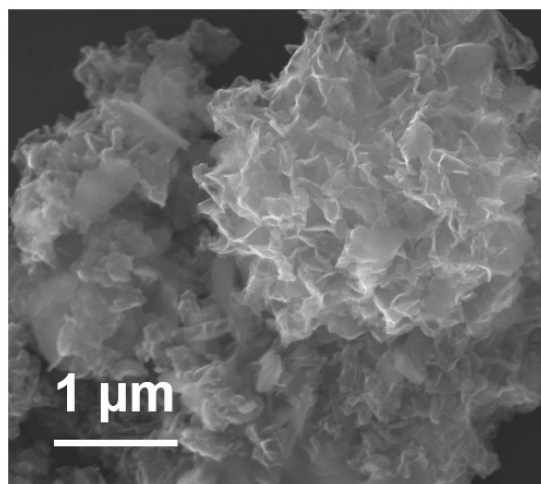

**Figure S3.** SEM images of Co<sub>9</sub>S<sub>8</sub>@MoS<sub>2</sub>-after the catalytic OER test.

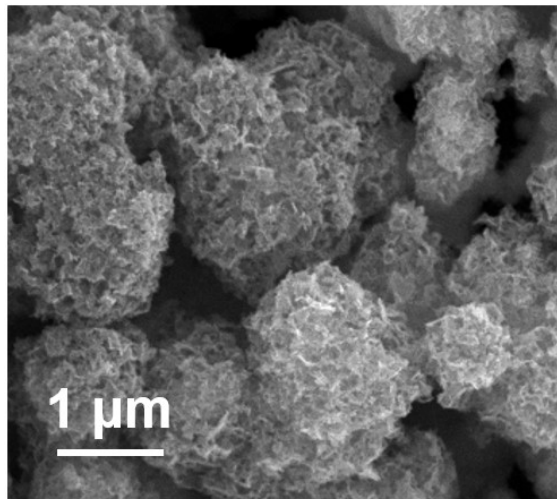

**Figure S4.** SEM images of Co<sub>9</sub>S<sub>8</sub>@MoS<sub>2</sub>-after the catalytic HER test.

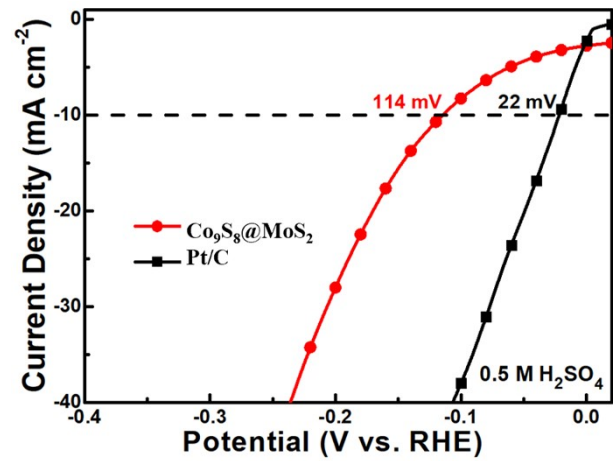

Figure S5. HER performance of Co<sub>9</sub>S<sub>8</sub>@MoS<sub>2</sub> in 0.5 M H<sub>2</sub>SO<sub>4</sub>.

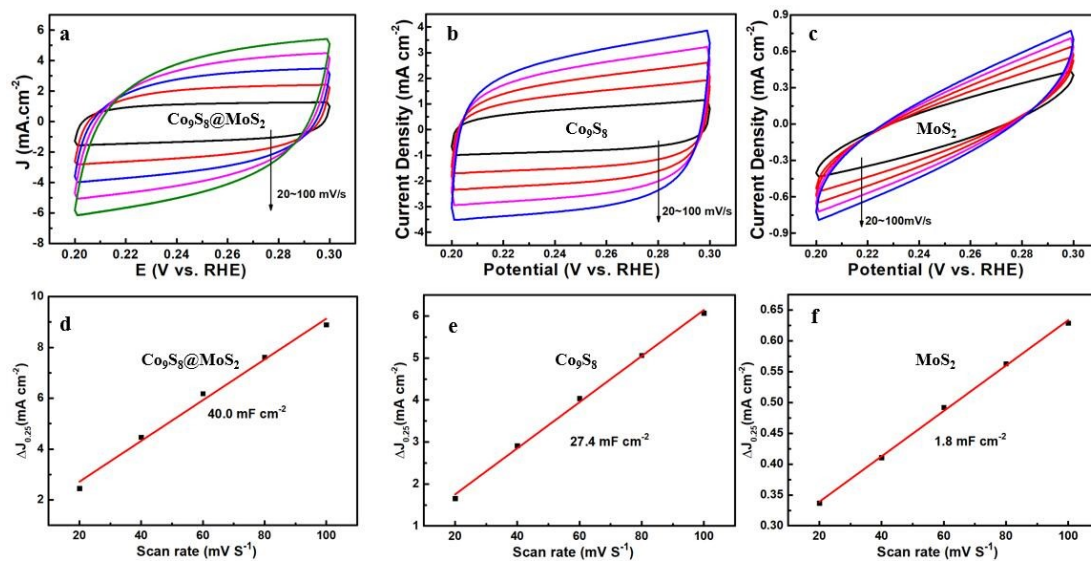

**Figure S6.** Cyclic voltammograms of (a)  $\text{Co}_9\text{S}_8@\text{MoS}_2$ , (b)  $\text{Co}_9\text{S}_8$ , (c)  $\text{MoS}_2$  at different scan rates from 20 to 100  $\text{mV s}^{-1}$ . Linear slopes were plotted from the cyclic voltammograms of (d)  $\text{Co}_9\text{S}_8@\text{MoS}_2$ , (e)  $\text{Co}_9\text{S}_8$  and (f)  $\text{MoS}_2$  in 1M KOH. The linear slopes are equivalent to twice the double-layer capacitance ( $C_{dl}$ ).

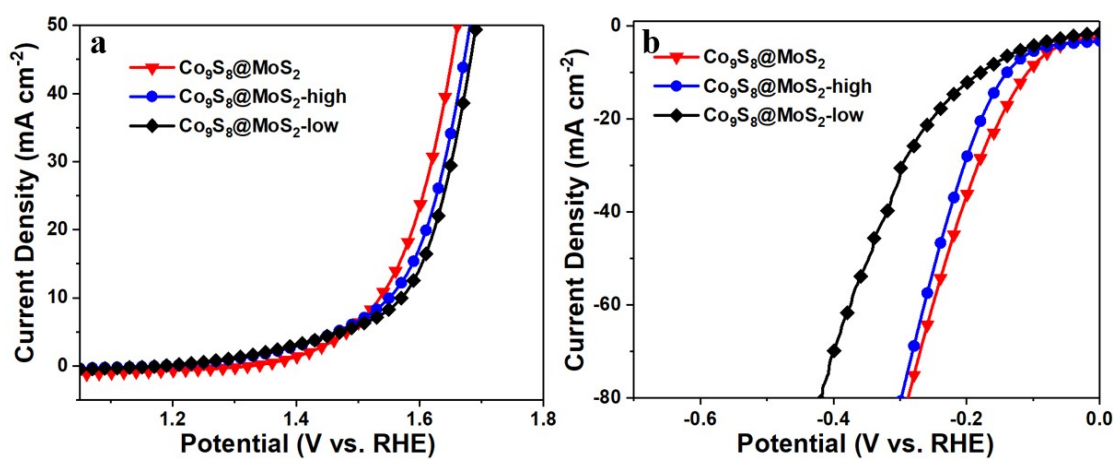

**Figure S7.** LSV curves of  $\text{Co}_9\text{S}_8@\text{MoS}_2$ ,  $\text{Co}_9\text{S}_8@\text{MoS}_2\text{-high}$  and  $\text{Co}_9\text{S}_8@\text{MoS}_2\text{-low}$  electrodes in 1 M KOH for OER (a) and HER (b).

**Table S1.** The reported HER and OER of some cobalt- and molybdenum-based sulfides electrocatalysts compared with that of this study.

| Catalyst                                                                          | Reaction   | Current density<br>j=10<br>mA cm <sup>-2</sup> | $\eta$ at     |                                | Tafel slope<br>(mV•dec <sup>-1</sup> ) |                                | Reference        |
|-----------------------------------------------------------------------------------|------------|------------------------------------------------|---------------|--------------------------------|----------------------------------------|--------------------------------|------------------|
|                                                                                   |            |                                                | corresponding |                                |                                        |                                |                  |
|                                                                                   |            |                                                | j (mV)        |                                | 1M                                     | 0.5M                           |                  |
|                                                                                   |            |                                                | KOH           | H <sub>2</sub> SO <sub>4</sub> | KOH                                    | H <sub>2</sub> SO <sub>4</sub> |                  |
| <b>Co<sub>9</sub>S<sub>8</sub>-MoS<sub>2</sub></b>                                | <b>HER</b> | <b>10</b>                                      | <b>103</b>    | <b>114</b>                     | <b>124</b>                             | <b>127</b>                     | <b>This work</b> |
|                                                                                   | <b>OER</b> | <b>10</b>                                      | <b>295</b>    | -                              | <b>175</b>                             | -                              |                  |
| <b>Co<sub>9</sub>S<sub>8</sub>-MoS<sub>2</sub>@3DC</b>                            | HER        | 10                                             | 177           | 230                            | 83.6                                   | 111.7                          | 1                |
|                                                                                   | OER        | -                                              | -             | -                              | -                                      | -                              |                  |
| <b>MoO<sub>2</sub>@MoS<sub>2</sub>@Co<sub>9</sub>S<sub>8</sub></b>                | HER        | 10                                             | 160           | -                              | 80                                     | -                              | 2                |
|                                                                                   | OER        | 10                                             | 310           | -                              | 70                                     | -                              |                  |
| <b>Co<sub>3</sub>S<sub>4</sub>@MoS<sub>2</sub></b>                                | HER        | 10                                             | 136           | -                              | 74                                     | -                              | 3                |
|                                                                                   | OER        | 10                                             | 280           | -                              | 43                                     | -                              |                  |
| <b>NiFe-LDH/FeCoS<sub>2</sub>/CFC</b>                                             | HER        | 10                                             | 308           | -                              | 157                                    | -                              | 4                |
|                                                                                   | OER        | 10                                             | 190           | -                              | 56                                     | -                              |                  |
| <b>Co<sub>9</sub>S<sub>8</sub>-Ni<sub>3</sub>S<sub>2</sub>-HNT<sub>s</sub>/Ni</b> | HER        | 10                                             | 85            | -                              | 83.1                                   | -                              | 5                |
|                                                                                   | OER        | 50                                             | 281           | -                              | 53.3                                   | -                              |                  |
| <b>Co<sub>9</sub>S<sub>8</sub>@MoS<sub>2</sub>/CNFs</b>                           | HER        | 10                                             | -             | 190                            | -                                      | 110                            | 6                |
|                                                                                   | OER        | 10                                             | 430           | -                              | 61                                     | -                              |                  |
| <b>CoS<sub>x</sub>-Ni<sub>3</sub>S<sub>2</sub>/NF</b>                             | HER        | 10                                             | 204           | -                              | 133                                    | -                              | 7                |
|                                                                                   | OER        | 20                                             | 280           | -                              | 105                                    | -                              |                  |
| <b>CoMoS<sub>4</sub>-Ni<sub>3</sub>S<sub>2</sub>/NF</b>                           | HER        | 10                                             | 158           | 93                             | 169                                    | -                              | 8                |
|                                                                                   | OER        | 10                                             | 200           | -                              | 63                                     | -                              |                  |
| <b>Co<sub>9</sub>S<sub>8</sub>@MoS<sub>2</sub>/N</b>                              | HER        | 10                                             | 126           | -                              | 74.1                                   | -                              | 9                |
|                                                                                   | OER        | 10                                             | 233           | -                              | 56.3                                   | -                              |                  |
| <b>Co<sub>9</sub>S<sub>8</sub>@MoS<sub>2</sub></b>                                | HER        | 10                                             | 143           | 171                            | 117                                    | 123                            | 10               |
|                                                                                   | OER        | 10                                             | 342           | -                              | 94                                     | -                              |                  |



## References

- 1 L. Diao, B. Zhang, Q. Sun, N. Wang, N. Zhao, C. Shi, E. Liu and C. He, *Nanoscale*, 2019, **11**, 21479-21486.
- 2 Y. Li, C. Wang, M. Cui, J. Xiong, L. Mi and S. Chen, *Appl. Surf. Sci.*, 2020, **543**, 148804.
- 3 Y. Guo, J. Tang, Z. Wang, Y. Kang, Y. Bando and Y. Yamauchi, *Nano. Energy*, 2018, **47**, 494-502.
- 4 Z. Zhang, J. Zhou, H. Wei, Y. Dai, S. Li, H. Shi and G. Xu, *J. Mater. Sci.*, 2020, **55**, 1-16.
- 5 J. Li, P. Xu, R. Zhou, R. Li, L. Qiu, S. Jiang and D. Yuan, *Electrochim. Acta*, 2019, **299**, 152-162.
- 6 H. Zhu, J. Zhang, R. Yan Zhang, M. Du, Q. Wang, G. Gao, J. Wu, G. Wu, M. Zhang, B. Liu, J. Yao and X. Zhang, *Adv. Mater.*, 2015, **27**, 4752-4759.
- 7 S. Shit, S. Chhetri, W. Jang, N. C. Murmu, H. Koo, P. Samanta and T. Kuila, *ACS. Appl. Mater. Interfaces*, 2018, **10**, 27712-27722.
- 8 P. Hu, Z. Jia, H. Che, W. Zhou, N. Liu, F. Li and J. Wang, *J. Power. Sources*, 2019, **416**, 95-103.
- 9 M. Kim, H. Seok, C. S. Selvam, J. Cho, G. H. Choi, M. G. Nam, S. Kang, T. Kim and P. J. Yoo, *J. Power. Sources*, 2021, **493**, 229688.
- 10 J. Bai, T. Meng, D. Guo, S. Wang, B. Mao and M. Cao, *ACS. Appl. Mater. Interfaces*, 2018, **10**, 1678-1689.
